# Supplementary material for: First Report of Canine Bufavirus and Its Whole Genome Sequence in India
Source: Research Square preprint supplement (doi:10.21203/rs.3.rs-1059504/v1), 2021-11-17
Supplement: Supplementary file 1 [file 3ddab0405518684d244b01cc.docx]

**Table S1 Details of samples collected for Bufavirus screening**

| **S. No.** | **Sample No.** | **Age** | **DHPPI Vaccination History** |
| --- | --- | --- | --- |
|
| 1 | 112/2019/PVNRTVU | 4 m | NO |
| 2 | 119/2019/PVNRTVU | 4 m | YES |
| 3 | 120/2019/PVNRTVU | 4 m | YES |
| 4 | 137/2019/PVNRTVU | 13 m | N/A |
| 5 | 146/2019/PVNRTVU | 15 m | N/A |
| 6 | 147/2019/PVNRTVU | 6 m | NO |
| 7 | 149/2019/PVNRTVU | 51 d | NO |
| 8 | 156/2019/PVNRTVU | 18 m | NO |
| 9 | 157/2019/PVNRTVU | 10 m | YES |
| 10 | 158/2019/PVNRTVU | 3 m | YES |
| 11 | 161/2019/PVNRTVU | 1 m | NO |
| 12 | 164/2019/PVNRTVU | 2 m | NO |
| 13 | 165/2019/PVNRTVU | 14 m | N/A |
| 14 | 167/2019/PVNRTVU | 45 d | NO |
| 15 | 169/2019/PVNRTVU | 4 yr | YES |
| 16 | 170/2019/PVNRTVU | 4 m | YES |
| 17 | 172/2019/PVNRTVU | 13 m | N/A |
| 18 | 173/2019/PVNRTVU | 18 m | N/A |
| 19 | 188/2019/PVNRTVU | 4 yr | NO |
| 20 | 191/2019/PVNRTVU | 2 ½ m | YES |
| 21 | 200/2019/PVNRTVU | 1 yr | YES |
| 22 | 203/2019/PVNRTVU | 5 yr | YES |
| 23 | 208/2019/PVNRTVU | 3 ½ m | NO |
| 24 | 209/2019/PVNRTVU | 5 ½ m | YES |
| 25 | 212/2019/PVNRTVU | 16 m | N/A |
| 26 | 213/2019/PVNRTVU | 14 m | N/A |
| 27 | 217/2019/PVNRTVU | 2 yr | N/A |
| 28 | 223/2019/PVNRTVU | 18 m | N/A |
| 29 | 226/2019/PVNRTVU | 5 yr | NO |
| 30 | 229/2019/PVNRTVU | 5 m | NO |
| 31 | 238/2019/PVNRTVU | 5 yr | NO |
| 32 | 249/2019/PVNRTVU | 6 m | NO |
| 33 | 265/2019/PVNRTVU | 15 m | N/A |
| 34 | 291/2019/PVNRTVU | 2 m | NO |
| 35 | 298/2019/PVNRTVU | 6 ½ yr | YES |
| 36 | 299/2019/PVNRTVU | 1 ½ yr | YES |
| 37 | 301/2019/PVNRTVU | 2 yr | N/A |
| 38 | 303/2019/PVNRTVU | 5 yr | NO |
| 39 | 305/2019/PVNRTVU | 1 m | YES |
| 40 | 306/2019/PVNRTVU | 2 ½ m | YES |
| 41 | 310/2019/PVNRTVU | 8 m | YES |
| 42 | 312/2019/PVNRTVU | 5 ½ m | YES |
| 43 | 317/2019/PVNRTVU | 3 m | YES |
| 44 | 318/2019/PVNRTVU | 3 m | NO |
| 45 | 319/2019/PVNRTVU | 2 m | NO |
| 46 | 320/2019/PVNRTVU | 3 m | NO |
| 47 | 321/2019/PVNRTVU | 2 m | NO |
| 48 | 323/2019/PVNRTVU | 18 m | N/A |
| 49 | 324/2019/PVNRTVU | 4 m | NO |
| 50 | 328/2019/PVNRTVU | 3 m | YES |
| 51 | 329/2019/PVNRTVU | 3 m | YES |
| 52 | 330/2019/PVNRTVU | 5 m | NO |
| 53 | 331/2019/PVNRTVU | 49 d | NO |
| 54 | 333/2019/PVNRTVU | 45 d | NO |
| 55 | 334/2019/PVNRTVU | 5 m | YES |
| 56 | 335/2019/PVNRTVU | 55 d | NO |
| 57 | 336/2019/PVNRTVU | 45 d | NO |
| 58 | 337/2019/PVNRTVU | 40 d | NO |
| 59 | 338/2019/PVNRTVU | 3 m | YES |
| 60 | 339/2019/PVNRTVU | 3 yr | YES |
| 61 | 340/2019/PVNRTVU | 4 m | NO |
| 62 | 341/2019/PVNRTVU | 4 m | NO |
| 63 | 342/2019/PVNRTVU | 10 yr | NO |
| 64 | 343/2019/PVNRTVU | 3 m | NO |
| 65 | 371/2019/PVNRTVU | 1 m | NO |
| 66 | 375/2019/PVNRTVU | 3 m | NO |
| 67 | 376/2019/PVNRTVU | 1 yr | YES |
| 68 | 377/2019/PVNRTVU | 3 m | NO |
| 69 | 378/2019/PVNRTVU | 2 m | NO |
| 70 | 379/2019/PVNRTVU | 2 m | YES |
| 71 | 380/2019/PVNRTVU | 4 yr | NO |
| 72 | 381/2019/PVNRTVU | 2 m | NO |
| 73 | 383/2019/PVNRTVU | 2 yr | N/A |
| 74 | 384/2019/PVNRTVU | 6 m | NO |
| 75 | 385/2019/PVNRTVU | 3 m | NO |
| 76 | 386/2019/PVNRTVU | 8 m | YES |
| 77 | 387/2019/PVNRTVU | 10 m | YES |
| 78 | 395/2019/PVNRTVU | 2 m | NO |
| 79 | 396/2019/PVNRTVU | 3 m | NO |
| 80 | 397/2019/PVNRTVU | 1 m | YES |
| 81 | 400/2019/PVNRTVU | 1 ½ m | NO |
| 82 | 401/2019/PVNRTVU | 6 m | NO |
| 83 | 403/2019/PVNRTVU | 3 m | NO |
| 84 | 404/2019/PVNRTVU | 8 m | YES |
| 85 | 405/2019/PVNRTVU | 7½ m | YES |
| 86 | 406/2019/PVNRTVU | 9 m | YES |
| 87 | 407/2020/PVNRTVU | 6 m | NO |
| 88 | 408/2019/PVNRTVU | 1 m | NO |
| 89 | 409/2019/PVNRTVU | 4 m | YES |
| 90 | 410/2019/PVNRTVU | 10 yr | YES |
| 91 | 411/2019/PVNRTVU | 6 m | YES |
| 92 | 412/2019/PVNRTVU | 8 m | YES |
| 93 | 413/2019/PVNRTVU | 5 m | YES |
| 94 | 414/2019/PVNRTVU | 4 m | YES |
| 95 | 415/2019/PVNRTVU | 14 m | YES |
| 96 | 416/2019/PVNRTVU | 8 m | YES |
| 97 | 418/2019/PVNRTVU | 5 m | YES |
| 98 | 421/2019/PVNRTVU | 2 m | NO |
| 99 | 422/2020/PVNRTVU | 6 m | NO |
| 100 | 423/2020/PVNRTVU | 50 d | NO |
| 101 | 425/2020/PVNRTVU | 3 m | NO |
| 102 | 426/2020/PVNRTVU | 3 m | NO |
| 103 | 427/2020/PVNRTVU | 10 m | NO |
| 104 | 428/2020/PVNRTVU | 13 m | NO |
| 105 | 429/2020/PVNRTVU | 3 yr | NO |
| 106 | 430/2020/PVNRTVU | 18 m | NO |
| 107 | 432/2020/PVNRTVU | 1½ m | YES |
| 108 | 436/2020/PVNRTVU | 2 m | N/A |
| 109 | 438/2020/PVNRTVU | 5 m | YES |
| 110 | 442/2020/PVNRTVU | 3 m | YES |
| 111 | 443/2020/PVNRTVU | 2 m | NO |
| 112 | 444/2020/PVNRTVU | 4 m | N/A |
| 113 | 448/2020/PVNRTVU | 7 m | NO |
| 114 | 452/2020/PVNRTVU | 9 m | N/A |
| 115 | 453/2020/PVNRTVU | 10 m | YES |
| 116 | 461/2020/PVNRTVU | 5 m | YES |
| 117 | 463/2020/PVNRTVU | 5 m | NO |
| 118 | 466/2020/PVNRTVU | 2 m | YES |
| 119 | 474/2020/PVNRTVU | 5 m | YES |
| 120 | 475/2020/PVNRTVU | 4 m | YES |
| 121 | 478/2020/PVNRTVU | 1 yr | NO |
| 122 | 479/2020/PVNRTVU | 6 m | YES |
| 123 | 480/2020/PVNRTVU | 2 yr | NO |
| 124 | 481/2020/PVNRTVU | 3 yr | YES |
| 125 | 482/2020/PVNRTVU | 8 m | YES |
| 126 | 483/2020/PVNRTVU | 1 yr | YES |
| 127 | 484/2020/PVNRTVU | 9 yr | YES |
| 128 | 485/2020/PVNRTVU | 6 m | YES |
| 129 | 486/2020/PVNRTVU | 7 m | NO |
| 130 | 487/2020/PVNRTVU | 4 m | YES |
| 131 | 489/2020/PVNRTVU | 3 m | NO |
| 132 | 490/2020/PVNRTVU | 5 m | YES |
| 133 | 491/2020/PVNRTVU | 5 m | YES |
| 134 | 492/2020/PVNRTVU | 2 m | NO |
| 135 | 493/2020/PVNRTVU | 9 m | YES |
| 136 | 494/2020/PVNRTVU | 8 m | YES |
| 137 | 495/2020/PVNRTVU | 15 m | NO |
| 138 | 496/2020/PVNRTVU | 2 m | NO |
| 139 | 497/2020/PVNRTVU | 2 m | YES |
| 140 | 498/2020/PVNRTVU | 3 m | YES |
| 141 | 499/2020/PVNRTVU | 5 m | YES |
| 142 | 500/2020/PVNRTVU | 3 m | YES |
| 143 | 501/2020/PVNRTVU | 4 m | YES |
| 144 | 502/2020/PVNRTVU | 2 m | YES |
| 145 | 503/2020/PVNRTVU | 6 m | YES |
| 146 | 504/2020/PVNRTVU | 4 m | YES |
| 147 | 505/2020/PVNRTVU | 50 d | YES |
| 148 | 506/2020/PVNRTVU | 2 m | NO |
| 149 | 507/2020/PVNRTVU | 4 m | YES |
| 150 | 508/2020/PVNRTVU | 20 m | N/A |
| 151 | 509/2020/PVNRTVU | 80 d | NO |
| 152 | 510/2020/PVNRTVU | 7 m | YES |
| 153 | 511/2020/PVNRTVU | 5 m | YES |
| 154 | 512/2020/PVNRTVU | 40 d | NO |
| 155 | 513/2020/PVNRTVU | 8 m | YES |
| 156 | 514/2020/PVNRTVU | 75 d | YES |
| 157 | 515/2020/PVNRTVU | 4 m | YES |
| 158 | 516/2020/PVNRTVU | 5 m | YES |
| 159 | 517/2020/PVNRTVU | 4 m | YES |
| 160 | 518/2020/PVNRTVU | 2 m | NO |
| 161 | 519/2020/PVNRTVU | 4 m | NO |
| 162 | 520/2020/PVNRTVU | 2 m | NO |
| 163 | 521/2020/PVNRTVU | 12 yr | YES |
| 164 | 522/2020/PVNRTVU | 2 m | NO |
| 165 | 523/2020/PVNRTVU | 20 d | NO |
| 166 | 524/2020/PVNRTVU | 1 yr | NO |
| 167 | 525/2020/PVNRTVU | 1 m | NO |
| 168 | 526/2020/PVNRTVU | 6 m | YES |
| 169 | 527/2020/PVNRTVU | 5 m | YES |
| 170 | 528/2020/PVNRTVU | 7 m | NO |
| 171 | 529/2020/PVNRTVU | 2 yr | YES |
| 172 | 530/2020/PVNRTVU | 5 m | YES |
| 173 | 531/2020/PVNRTVU | 6 m | NO |
| 174 | 532/2020/PVNRTVU | 45 d | YES |
| 175 | 533/2020/PVNRTVU | 1 yr | YES |
| 176 | 534/2020/PVNRTVU | 6 m | YES |
| 177 | 535/2020/PVNRTVU | 9 m | NO |
| 178 | 536/2020/PVNRTVU | 3 m | YES |
| 179 | 537/2020/PVNRTVU | 1 yr | YES |
| 180 | 538/2020/PVNRTVU | 2½ yr | NO |
| 181 | 555/2020/PVNRTVU | 5 m | NO |
| 182 | 556/2020/PVNRTVU | 4 m | NO |
| 183 | 566/2020/PVNRTVU | 6 m | YES |
| 184 | 577/2020/PVNRTVU | 2 yr | YES |
| 185 | 629/2020/PVNRTVU | 3 yr | N/A |
| 186 | 639/2020/PVNRTVU | 18 m | N/A |

**Note:** N/A indicate the data is not available with the owner of the dog

**Table S2 Primers used for whole genome amplification and sequencing of CaBuV**

| **Primer Name** | **Primer sequence (5'-3')** | **Amplicon size (bp)** | **PCR Conditions** |
| --- | --- | --- | --- |
| BUFA1 F | ATGGCTACATCTACATTCTCTGAC | 952 | 94oC 5 min; 40 cycles of 94oC 30 sec, 54oC 30sec, 70oC 40 sec; and 70oC for 5 min |
| BUFA1 R | GCTTTGATGATAGTTTCACCACCTG |
| BUFA2 F | ACAGGATGAAGGAAACCACAGTAAC | 1183 | 94oC 5 min; 40 cycles of 94oC 30 sec, 54oC 30sec, 70oC 50 sec; and 70oC for 5 min |
| BUFA2 R | AACATTTACCCACAACCCATATAGA |
| BUFA3 F | AGCAAGCTACTGTAAACGGTGGGGT | 1351 | 94oC 5 min; 40 cycles of 94oC 30 sec, 54oC 30sec, 70oC 60 sec; and 70oC for 5 min |
| BUFA3 R | TGTGTTGTTTCTTCCTGTCCTGTGC |
| BUFA4 F | CTCTACCAAACAGACCACGGAC | 848 | 94oC 5 min; 40 cycles of 94oC 30 sec, 54oC 30sec, 70oC 40 sec; and 70oC for 5 min |
| BUFA4 R | CTAGATGGTTGGCCTGGATTG |
| BUFA5 F | CAATCGGAGGTGAGGGAC | 815 | 94oC 5 min; 40 cycles of 94oC 30 sec, 52oC 30sec, 70oC 40 sec; and 70oC for 5 min |
| BUFA5 R | TTATAGAGTAATATTAGGCATAGCT |
